# Supplementary material
Source: Royal Society of Chemistry journal article supplement (doi:10.1039/d5en00934k)
Supplement: d5en00934k1.pdf [file d5en00934k1.pdf]

1 **Supplementary information:**

2

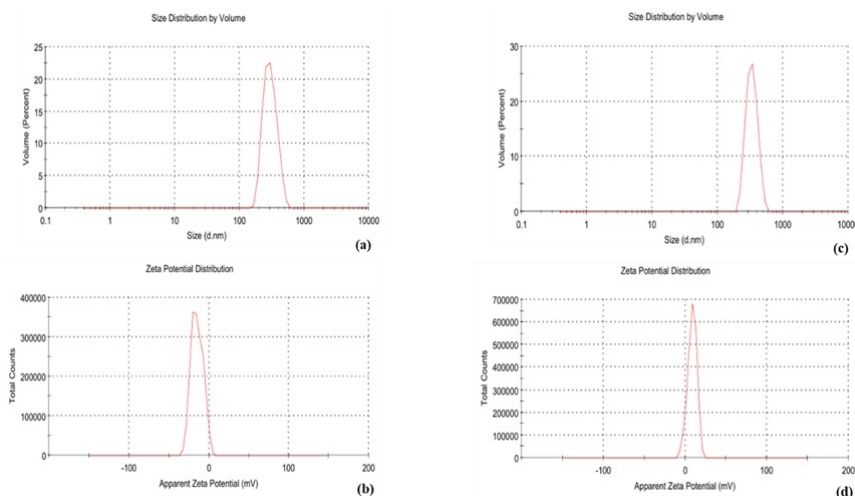

3

4 Fig. S1. Dynamic light scattering (DLS) size distribution by volume and zeta potential analysis  
 5 of ZnO NPs (a,b) and GB-ZnO NPs (c,d).

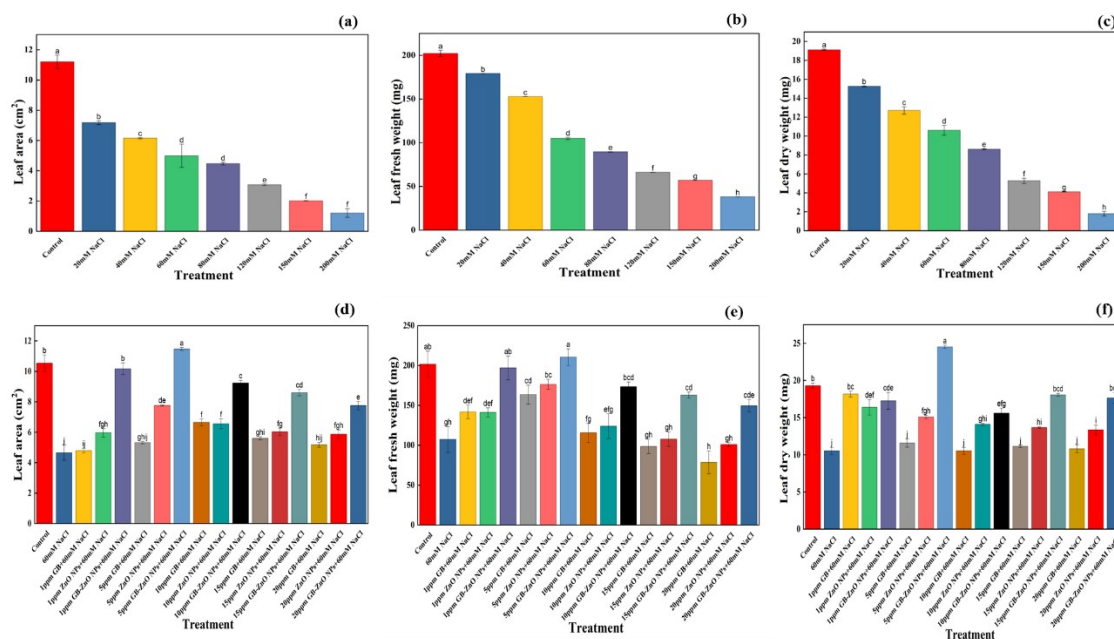

6

7 Fig. S2. Effects of different salt concentrations on leaf area (a), leaf fresh weight (b), and leaf  
 8 dry weight (c) of mung bean seedlings. The influence of different seed-priming doses (0, 1, 5,  
 9 10, 15, and 20 ppm) on leaf area (d), leaf fresh weight (e), and leaf dry weight (f) of mung bean  
 10 seedlings subjected to 60 mM NaCl stress. Data are presented as mean ± SD. Different letters  
 11 above bars indicate statistically significant differences (p<0.05).

12

13

14

15

16

17

18

19

20

21

22

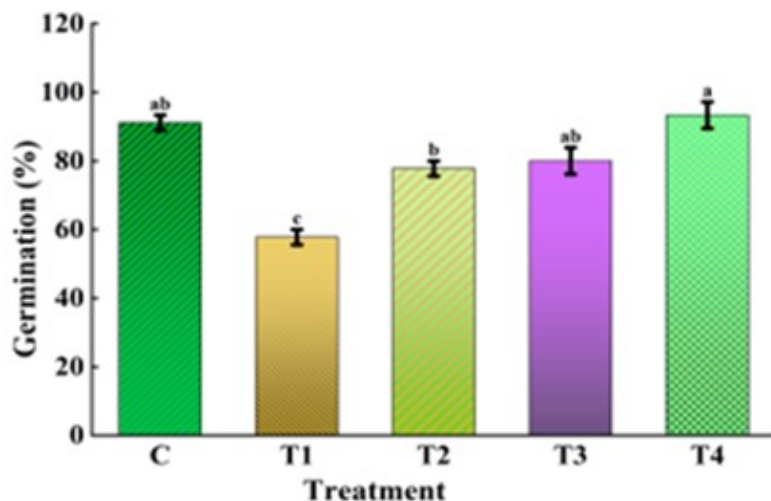

22

23 Fig. S3. Effects of different seed treatments on the germination of seeds under 60 mM salinity  
24 on the 3rd day. Treatments were C (0 mM NaCl + hydroprimed seed, control), T1 (60 mM  
25 NaCl + hydroprimed seed), T2 (60 mM NaCl + 5 ppm GB primed seed), T3 (60 mM NaCl +  
26 5 ppm ZnO NPs primed seed), and T4 (60 mM NaCl + 5 ppm GB-ZnO NPs primed seed). Data  
27 are presented as mean  $\pm$  SD. Different letters above bars indicate statistically significant  
28 differences ( $p < 0.05$ ).
